# Supplementary material for: A Randomized Withdrawal, Placebo-Controlled Study Evaluating the Efficacy and Tolerability of Tapentadol Extended Release in Patients With Chronic Painful Diabetic Peripheral Neuropathy
Source: Oxford University Press journal article supplement (doi:10.2337/dc13-2291), 2014-05-22
Supplement: dc132291supplementarydata.pdf [file dc132291supplementarydata.pdf]

## SUPPLEMENTARY DATA

This clinical trial was conducted under the guidance of the following principal investigators: Suzan Abdel-Salam, MD, Ontario, Canada; Michael Adams, MD, MBBS, Radiant Research, Salt Lake City, Utah; Marc Afilalo, MD, MCFP(EM), FACEP, CSPQ, FRCPC(C), ED-AMR, Quebec, Canada; Laura Akright, MD, InVisions Consultants, LLC, San Antonio, Texas; Christopher D. Alftine, MD, Sunstone Medical Research, LLC, Medford, Oregon; Pamela Amador, MD, Gables Research, Miami, Florida; Ronnie Aronson, MD, FRCPC, FACE, Ontario, Canada; Armen H. Arslanian, MD, Brockton, Massachusetts; Jeffrey E. Atkinson, MD, Chesapeake Research Group, LLC, Pasadena, Maryland; Sarah Atkinson, MD, Finger Lakes Clinical Research, Rochester, New York; Maxwell Axler, MD, Clinical Trial Network, Houston, Texas; Andre Belanger, MD, Quebec, Canada; Kyra Blatt, MD, The Medical Research Network, LLC, New York, New York; Dennis Callaghan, MD, Ontario, Canada; Leonard H. S. Chuck, PhD, MD, Diablo Clinical Research Incorporated, Walnut Creek, California; John Cochran II, MD, Alexandria Fairfax Neurology, PC, Alexandria, Virginia; Michael DeSantis, MD, Clinical Trials of America, Inc., Hickory, North Carolina; Eric L. Diamond, DPM, Crossroads Research, Inc., Owings Mills, Maryland; Guiseppe D'Ignazio, MD, Clinic Source Unique Research, Ontario, Canada; Michael J. Drass, MD, Allegheny Pain Management, Altoona, Pennsylvania; Steven K. Elliott, MD, MediSphere Medical Research Center, LLC, Evansville, Indiana; William Travis Ellison, MD, Radiant Research, Inc., Greer, South Carolina; Grace Forde, MD, North American Partners in Pain Management, Valley Stream, New York; Sally Godsell, MD, Okanagan Clinical Trials, British Columbia, Canada; Arnold Greenberg, MD, Center for Clinical Research, Inc., San Francisco, California; Joe Gregory, DO, Clinical Research Advantage, Inc., Central Arizona Medical Associates, PC, Tempe, Arizona; Gregory A. Haase, MD, Tidewater Integrated Medical Research, Virginia Beach, Virginia; Charles E. Hall, MD, Horizon Research Group, Inc., Mobile, Alabama; Tami Helmer, MD, Radiant Research Inc, Edina, Minnesota; Raymond Hoofft, MD, Mountain West Clinical Trials, Eagle, Idaho; Susan E. Hotz, MD, Neurological Clinic of Texas, P.A., Dallas, Texas; Bret House, MD, AHN Research, Fishers, Indiana; William A. Kaye, MD, FACP, Metabolic Research Institute, Inc., West Palm Beach, Florida; Stephen W. Kayota, MD, Tidewater Integrated Medical Research, Virginia Beach, Virginia; Susan E. Kemp, MD, Clinical Trials of America, Inc., Shreveport, Louisiana; Melissa M. Kempf, MD, Oakwell Clinical Research, LLC, San Antonio, Texas; Howard J. Kerstein, MD, Denver, Colorado; Alan J. Kivitz, MD, CPI, Altoona Center for Clinical Research, Duncansville, Pennsylvania; Andrew Klymiuk, MD, KRK Medical Research, Dallas, Texas; Elias M. Kolettis, DO, MS, Clinical Research of West Florida, Inc., Clearwater, Florida; James Kopp, MD, Hartwell Research, Anderson, South Carolina; Dennis M. Lacey, MD, NeuroTrials Research, Inc., Atlanta, Georgia; Robert S. Lipetz, DO, Encompass Clinical Research, Spring Valley, California; Daniel L. Lorber, MD, Diabetes Care & Information Center of New York, Flushing, New York; Lon D. Lynn, DO, Clinical Research of West Florida, Inc., Tampa, Florida; Hassan Malik, MD, Radiant Research, Inc., Akron, Ohio; Michael Mann, MD, Athena Clinical Research, Bulverde, Texas; Perry Mayer, MD, MB, BCh, BAO, The Mayer Institute, Ontario, Canada; Andre Michon, MD, CCFP, Medicor Research Inc., Ontario, Canada; Martin Mollen, MD, Arizona Research Center, Phoenix, Arizona; Bruce Nicholson, MD, Lehigh Valley Health Network Pain Research, Lehigh Valley Health Network Center for Pain Management, and Lehigh Valley Health Network Clinical Pharmacy, Allentown, Pennsylvania; Paul Norwood, MD, Valley Research, Fresno, California; Michael Noss, MD, Radiant Research, Cincinnati, Ohio; Margarita Nunez, MD, Comprehensive Neurosciences, Inc., St. Petersburg, Florida; Michael O'Mahony, MD, London Road Diagnostic Clinic and Medical Centre, Ontario, Canada; Ashokkumar Patel, MD, MPH, Radiant Research, St. Louis, Missouri; Kashyap Patel, MD, Peninsula Research Inc, Ormond Beach, Florida; Patrick Peters Jr., MD, Texas Medical Research Associates, LLC, San Antonio, Texas; Lew Pliamm, MD, CCFP, FCFP, Canadian Phase Onward Inc., Ontario, Canada; Bryan Pogue, MD, Selah Medical Center, Boise, Idaho; Alan J. Reichman, MD, Clinical Trial Network, Houston, Texas; William Reilly, MD, Basin Orthopedic Surgical, Odessa, Texas; Joshua Rosenthal, MD, Capital Research Associates,

## SUPPLEMENTARY DATA

Rockville, Maryland; Stuart Ross, MD, FRACP, FRCPC, Alberta, Canada; Jamshid Saleh, MD, Northern California Clinical Research Center, Redding, California; Andrew Schreiber, MD, SDS Clinical Trials, Orange, California; Randall Severance, MD, Radiant Research Phoenix, Chandler, Arizona; Timothy Smith, MD, Mercy Health Research, St. Louis, Missouri; Mary Louise Stedman, MD, Stedman Clinical Trials, Tampa, Florida; Ronald Stegemoller, MD, American Health Network, Avon, Indiana; Davis Steiner, MD, Five Towns Neuroscience Research, Cedarhurst, New York; Donald Taylor, MD, Taylor Research, LLC, Marietta, Georgia; Haydn Mikel Thomas, MD, Clinical Trials Technology, Prairie Village, Kansas; Cory Toth, MD, FRCPC, University of Calgary, Heritage Medical Research Clinic, Alberta, Canada; Christine Truitt, MD, Clinical Trials of Texas, San Antonio, Texas; Aaron Vinik, MD, PhD, EVMS-Strelitz Diabetes Center, Norfolk, Virginia; Walter Walthall IV, MD, North San Antonio Healthcare Associates, San Antonio, Texas; Arnold Weil, MD, Georgia Institute for Clinical Research, LLC, Marietta, Georgia; James Wild, MD, Upstate Clinical Research Associates, Williamsville, New York; Kerri Wilks, MD, MD Clinical, Hallandale Beach, Florida; Douglas Young, MD, Northern California Research, Sacramento, California.

SUPPLEMENTARY DATA

**Supplementary Figure 1.** Patient global impression of change (PGIC) at endpoint of the double-blind maintenance phase (ITT population).<sup>a</sup>

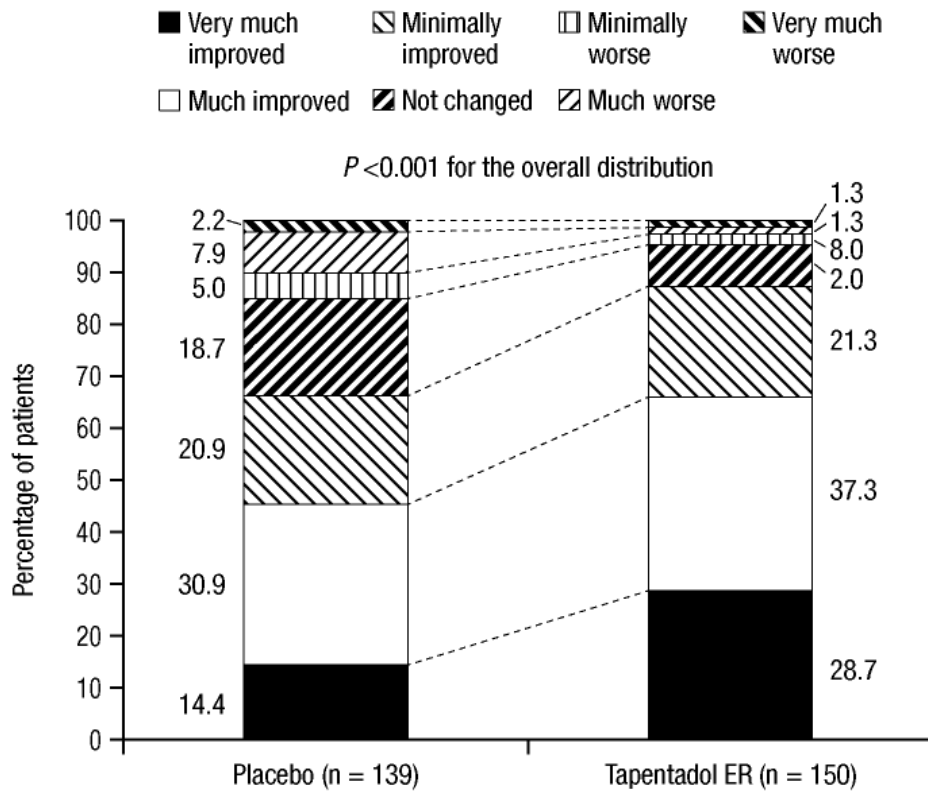

ITT, intent-to-treat; ER, extended release.

<sup>a</sup>Percentages may not total 100.0% because of rounding.

<sup>b</sup> $P < 0.001$  for the overall distribution

SUPPLEMENTARY DATA

**Supplementary Figure 2.** Duration of spontaneous pain during the past 24 hours at endpoint of the double-blind maintenance phase (ITT population).

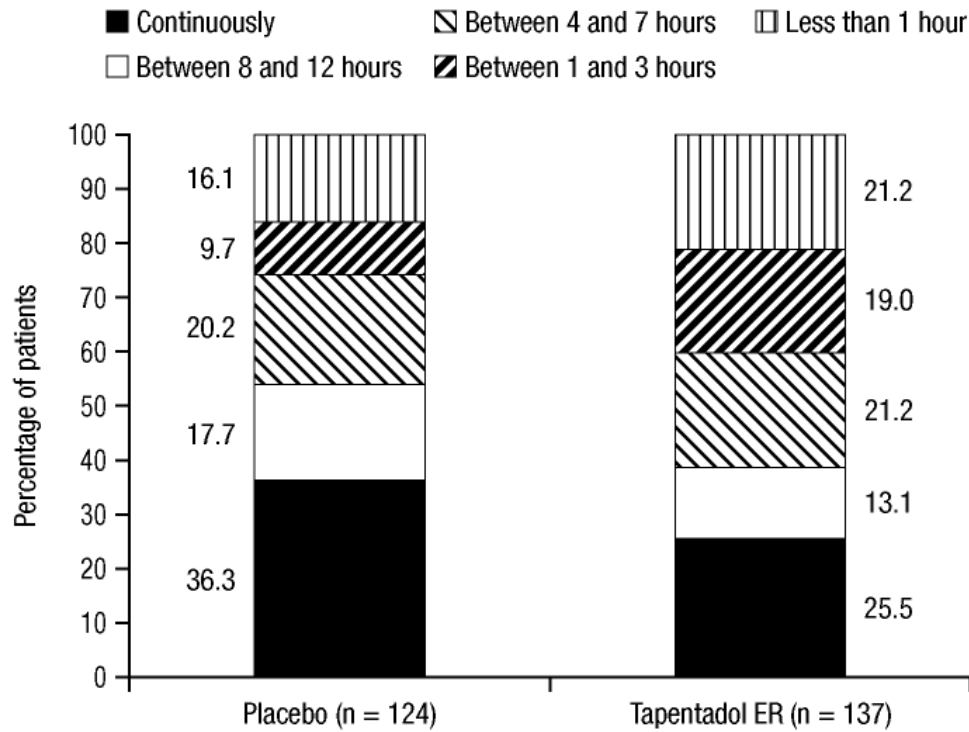

ITT, intent-to-treat; ER, extended release.

SUPPLEMENTARY DATA

**Supplementary Table 1.** Patient Demographic and Baseline Characteristics

| Characteristic                                             | OL safety population    | DB safety population |                         |
|------------------------------------------------------------|-------------------------|----------------------|-------------------------|
|                                                            | Tapentadol ER (n = 459) | Placebo (n = 152)    | Tapentadol ER (n = 166) |
| Gender, n (%)                                              |                         |                      |                         |
| Male                                                       | 266 (58.0)              | 88 (57.9)            | 99 (59.6)               |
| Female                                                     | 193 (42.0)              | 64 (42.1)            | 67 (40.4)               |
| Race, n (%)                                                |                         |                      |                         |
| White                                                      | 370 (80.6)              | 120 (78.9)           | 138 (83.1)              |
| Black or African American                                  | 60 (13.1)               | 22 (14.5)            | 23 (13.9)               |
| Asian                                                      | 9 (2.0)                 | 2 (1.3)              | 3 (1.8)                 |
| American Indian or Alaskan Native                          | 4 (0.9)                 | 2 (1.3)              | 1 (0.6)                 |
| Other                                                      | 16 (3.5)                | 6 (3.9)              | 1 (0.6)                 |
| Age, y                                                     |                         |                      |                         |
| Mean (SD)                                                  | 59.8 (10.30)            | 59.0 (9.00)          | 58.5 (10.63)            |
| Range                                                      | 28-86                   | 28-82                | 30-83                   |
| Age category, n (%)                                        |                         |                      |                         |
| <65 y                                                      | 305 (66.4)              | 109 (71.7)           | 122 (73.5)              |
| ≥65 y                                                      | 154 (33.6)              | 43 (28.3)            | 44 (26.5)               |
| Prior opioid use, n (%) <sup>a</sup>                       |                         |                      |                         |
| Yes                                                        | 148 (32.2)              | 48 (31.6)            | 52 (31.3)               |
| No                                                         | 311 (67.8)              | 104 (68.4)           | 114 (68.7)              |
| Body mass index, kg/m <sup>2</sup>                         |                         |                      |                         |
| Mean (SD)                                                  | 34.8 (9.22)             | 34.5 (7.84)          | 35.1 (11.47)            |
| Range                                                      | 17-146                  | 20-63                | 17-146                  |
| Start of OL pain intensity score <sup>b,c</sup>            |                         |                      |                         |
| Category, n (%)                                            |                         |                      |                         |
| Mild                                                       | 1 (0.2)                 | 0                    | 0                       |
| Moderate                                                   | 58 (12.6)               | 14 (9.2)             | 23 (13.9)               |
| Severe                                                     | 400 (87.1)              | 138 (90.8)           | 143 (86.1)              |
| Mean (SD)                                                  | 7.3 (1.30)              | 7.5 (1.27)           | 7.4 (1.27)              |
| Baseline pain intensity score (end of OL) <sup>b,d,e</sup> |                         |                      |                         |
| Category, n (%)                                            |                         |                      |                         |
| None                                                       | 7 (1.5)                 | 5 (3.3)              | 2 (1.2)                 |
|                                                            | 172 (37.5)              | 84 (55.3)            | 88 (53.0)               |

SUPPLEMENTARY DATA

|           |            |            |            |
|-----------|------------|------------|------------|
| Mild      | 92 (20.0)  | 39 (25.7)  | 52 (31.3)  |
| Moderate  | 48 (10.5)  | 24 (15.8)  | 23 (13.9)  |
| Severe    | 3.6 (1.99) | 3.5 (2.17) | 3.7 (1.78) |
| Mean (SD) |            |            |            |
|           |            |            |            |

OL, open-label; DB, double-blind; ER, extended release; SD, standard deviation; DPN, diabetic peripheral neuropathy.

<sup>a</sup>Prior opioid use was defined as any previous opioid analgesic use for the treatment of painful DPN for  $\geq 3$  weeks.

<sup>b</sup>Pain intensity is defined as none = 0, mild =  $>0$  to  $<4$ , moderate = 4 to  $<6$ , and severe =  $\geq 6$  on the 11-point numerical rating scale.

<sup>c</sup>Average of pain scores over 3 days prior to the start of titration.

<sup>d</sup>Average of pain scores over 72 hours prior to randomization.

<sup>e</sup>n = 319 for OL safety population; n = 165 for tapentadol ER DB safety population.

SUPPLEMENTARY DATA

**Supplementary Table 2.** Average Pain Intensity Changes From Start to Week 12 of the DB Maintenance Phase Using Different Imputation Methods: Sensitivity Analyses of the Primary Endpoint (ITT Population)

|                                         | <b>Placebo<br/>(n = 152)</b> | <b>Tapentadol ER<br/>(n = 166)</b> |
|-----------------------------------------|------------------------------|------------------------------------|
| <b>LOCF</b>                             |                              |                                    |
| Mean (SD) score at start of DB phase    | 3.53 (2.17)                  | 3.70 (1.78)                        |
| Mean (SD) change at Week 12 of DB phase | 1.30 (2.43)                  | 0.28 (2.04)                        |
| LSMD vs placebo (95% CI)                |                              | -0.95 (-1.42 to -0.49)             |
| <i>P</i> value (minus placebo)          |                              | <0.001                             |
| <b>BOCF</b>                             |                              |                                    |
| Mean (SD) score at start of DB phase    | 3.53 (2.17)                  | 3.70 (1.78)                        |
| Mean (SD) change at Week 12 of DB phase | 0.68 (1.82)                  | -0.00 (1.57)                       |
| LSMD vs placebo (95% CI)                |                              | -0.64 (-1.01 to -0.28)             |
| <i>P</i> value (minus placebo)          |                              | <0.001                             |
| <b>Modified BOCF</b>                    |                              |                                    |
| Mean (SD) score at start of DB phase    | 3.53 (2.17)                  | 3.70 (1.78)                        |
| Mean (SD) change at Week 12 of DB phase | 0.77 (2.03)                  | 0.05 (1.78)                        |
| LSMD vs placebo (95% CI)                |                              | -0.65 (-1.05 to -0.26)             |
| <i>P</i> value (minus placebo)          |                              | 0.001                              |
| <b>PMI</b>                              |                              |                                    |
| Mean (SD) score at start of DB phase    | 3.53 (2.17)                  | 3.70 (1.78)                        |
| Mean (SD) change at Week 12 of DB phase | 0.94 (2.22)                  | 0.17 (1.90)                        |
| LSMD vs placebo (95% CI)                |                              | -0.67 (-1.04 to -0.30)             |
| <i>P</i> value (minus placebo)          |                              | <0.001                             |
| <b>WOCF</b>                             |                              |                                    |
| Mean (SD) score at start of DB phase    | 3.53 (2.17)                  | 3.70 (1.78)                        |
| Mean (SD) change at Week 12 of DB phase | 2.00 (2.58)                  | 0.87 (2.17)                        |
| LSMD vs placebo (95% CI)                |                              | -1.10 (-1.58 to -0.61)             |
| <i>P</i> value (minus placebo)          |                              | <0.001                             |
| <b>Observed case</b>                    |                              |                                    |
| Mean (SD) score at start of DB phase    | 3.53 (2.17)                  | 3.70 (1.78)                        |
| Mean (SD) change at Week 12 of DB phase | 1.05 (2.31)                  | -0.04 (1.97)                       |
| LSMD vs placebo (95% CI)                |                              | -1.11 (-1.65 to -0.57)             |
| <i>P</i> value (minus placebo)          |                              | <0.001                             |

DB, double-blind; ITT, intent-to-treat; ER, extended release; LOCF, last observation carried forward; SD, standard deviation; LSMD, least-squares mean difference; CI, confidence interval; BOCF, baseline observation carried forward; PMI, placebo mean imputation; WOCF, worst observation carried forward.

SUPPLEMENTARY DATA

**Supplemental Table 3.** Average Pain Intensity and Change in Pain Intensity by Supplemental Tapentadol ER Use During Double-blind Treatment (LOCF; ITT Population)<sup>a</sup>

|                                                                                        | Placebo                                   |                                              | Tapentadol ER                             |                                              |
|----------------------------------------------------------------------------------------|-------------------------------------------|----------------------------------------------|-------------------------------------------|----------------------------------------------|
|                                                                                        | Supplemental tapentadol ER used (n = 112) | Supplemental tapentadol ER not used (n = 40) | Supplemental tapentadol ER used (n = 106) | Supplemental tapentadol ER not used (n = 59) |
| <b>Mean (SD) pain intensity</b>                                                        |                                           |                                              |                                           |                                              |
| Mean (SD) pain intensity at the start of open-label titration                          | 7.6 (1.32)                                | 7.1 (1.30)                                   | 7.5 (1.23)                                | 7.2 (1.10)                                   |
| Mean (SD) pain intensity at the start of double-blind treatment                        | 3.7 (2.26)                                | 3.2 (1.88)                                   | 3.8 (1.84)                                | 3.5 (1.66)                                   |
| Mean (SD) pain intensity at Week 12 of double-blind treatment                          | 5.2 (2.58)                                | 3.9 (2.46)                                   | 4.3 (2.35)                                | 3.5 (1.81)                                   |
| Mean (SD) change in pain intensity from the start to Week 12 of double-blind treatment | 1.5 (2.53)                                | 0.7 (2.03)                                   | 0.4 (2.28)                                | 0.0 (1.52)                                   |

ER, extended release; LOCF, last observation carried forward; ITT, intent-to-treat; SD, standard deviation.

<sup>a</sup>In both treatment groups, supplemental tapentadol ER 25 mg bid was permitted as additional analgesia during the first 4 days and once per day from Day 5 onward during the double-blind treatment period.

**Supplementary Table 4.** Brief Pain Inventory (BPI) Mean Pain Intensity and Pain Interference Score Changes From Start of the OL Phase to DB Endpoint (ITT Population)<sup>a</sup>

|                                             | Placebo (n = 137) | Tapentadol ER (n = 147) |
|---------------------------------------------|-------------------|-------------------------|
| <b>Pain intensity subscale score</b>        |                   |                         |
| Mean (SD) score at start of OL phase        | 6.8 (1.54)        | 6.6 (1.52)              |
| Mean (SD) change at DB endpoint             | -2.3 (2.33)       | -3.0 (2.16)             |
| <i>P</i> value (minus placebo) <sup>b</sup> |                   | 0.003                   |
| <b>Pain interference score</b>              |                   |                         |
| Mean (SD) score at start of OL phase        | 5.9 (2.30)        | 5.6 (2.32)              |
| Mean (SD) change at DB endpoint             | -2.6 (2.38)       | -3.0 (2.07)             |
| <i>P</i> value (minus placebo) <sup>b</sup> |                   | 0.050                   |

ITT, intent-to-treat; ER, extended release; SD, standard deviation; OL, open-label; DB, double-blind.

<sup>a</sup>Results are presented for all patients who had observations at both the start of the OL phase and at the endpoint of the DB maintenance phase.

<sup>b</sup>Tested using an analysis of covariance model with treatment, pooled analysis site, and dose category as factors and start of OL value as a covariate.



SUPPLEMENTARY DATA

**Supplementary Table 5.** Short Form-36 (SF-36) Mean Subscale and Summary Scores Changes From Start of the DB Phase to Endpoint of the DB Maintenance Phase (ITT Population)

| <b>SF-36 subscale or summary score</b> | <b>Placebo<br/>(n = 131)</b> | <b>Tapentadol ER<br/>(n = 146)</b> |
|----------------------------------------|------------------------------|------------------------------------|
| <b>Physical functioning subscale</b>   |                              |                                    |
| Mean (SD) score at start of DB phase   | 38.2 (11.35)                 | 37.3 (10.49)                       |
| Mean (SD) change at DB endpoint        | -1.7 (7.44)                  | 0.1 (7.50)                         |
| LSMD vs placebo (95% CI)               |                              | 1.5 (-0.21 to 3.23)                |
| <i>P</i> value (minus placebo)         |                              | 0.085                              |
| <b>Role-physical subscale</b>          |                              |                                    |
| Mean (SD) score at start of DB phase   | 41.9 (10.33)                 | 41.7 (9.89)                        |
| Mean (SD) change at DB endpoint        | -2.1 (7.14)                  | 0.8 (8.12)                         |
| LSMD vs placebo (95% CI)               |                              | 2.6 (0.85 to 4.29)                 |
| <i>P</i> value (minus placebo)         |                              | 0.004                              |
| <b>Bodily pain subscale</b>            |                              |                                    |
| Mean (SD) score at start of DB phase   | 44.2 (7.34)                  | 42.4 (7.03)                        |
| Mean (SD) change at DB endpoint        | -3.9 (8.80)                  | -0.0 (7.55)                        |
| LSMD vs placebo (95% CI)               |                              | 3.0 (1.24 to 4.69)                 |
| <i>P</i> value (minus placebo)         |                              | <0.001                             |
| <b>General health subscale</b>         |                              |                                    |
| Mean (SD) score at start of DB phase   | 42.2 (9.02)                  | 42.0 (9.35)                        |
| Mean (SD) change at DB endpoint        | -0.8 (6.39)                  | -0.4 (6.04)                        |
| LSMD vs placebo (95% CI)               |                              | 0.6 (-0.87 to 1.99)                |
| <i>P</i> value (minus placebo)         |                              | 0.444                              |
| <b>Vitality subscale</b>               |                              |                                    |
| Mean (SD) score at start of DB phase   | 45.8 (9.11)                  | 45.5 (9.13)                        |
| Mean (SD) change at DB endpoint        | -0.6 (8.00)                  | 0.3 (8.85)                         |
| LSMD vs placebo (95% CI)               |                              | 1.0 (-0.95 to 3.01)                |
| <i>P</i> value (minus placebo)         |                              | 0.307                              |
| <b>Social functioning subscale</b>     |                              |                                    |
| Mean (SD) score at start of DB phase   | 44.0 (10.54)                 | 44.4 (9.10)                        |
| Mean (SD) change at DB endpoint        | -1.2 (8.81)                  | 0.1 (8.65)                         |
| LSMD vs placebo (95% CI)               |                              | 1.7 (-0.29 to 3.59)                |
| <i>P</i> value (minus placebo)         |                              | 0.095                              |
| <b>Role-emotional subscale</b>         |                              |                                    |
| Mean (SD) score at start of DB phase   | 43.4 (11.72)                 | 43.6 (11.02)                       |
| Mean (SD) change at DB endpoint        | -1.9 (11.21)                 | 0.5 (10.15)                        |
| LSMD vs placebo (95% CI)               |                              | 2.2 (-0.22 to 4.53)                |
| <i>P</i> value (minus placebo)         |                              | 0.075                              |
| <b>Mental health subscale</b>          |                              |                                    |
| Mean (SD) score at start of DB phase   | 47.5 (10.20)                 | 47.2 (10.24)                       |
| Mean (SD) change at DB endpoint        | -1.1 (10.03)                 | -0.1 (8.66)                        |
| LSMD vs placebo (95% CI)               |                              | 1.0 (-1.16 to 3.11)                |
| <i>P</i> value (minus placebo)         |                              | 0.371                              |
| <b>Physical component summary</b>      |                              |                                    |
| Mean (SD) score at start of DB phase   | 40.1 (8.87)                  | 39.1 (8.52)                        |
| Mean (SD) change at DB endpoint        | -2.3 (6.40)                  | 0.1 (6.52)                         |

SUPPLEMENTARY DATA

|                                                            |              |                             |
|------------------------------------------------------------|--------------|-----------------------------|
| LSMD vs placebo (95% CI)<br><i>P</i> value (minus placebo) |              | 2.1 (0.67 to 3.57)<br>0.004 |
| <b>Mental component summary</b>                            |              |                             |
| Mean (SD) score at start of DB phase                       | 47.7 (10.79) | 48.1 (10.12)                |
| Mean (SD) change at DB endpoint                            | -0.8 (9.37)  | 0.2 (9.00)                  |
| LSMD vs placebo (95% CI)                                   |              | 1.1 (-0.97 to 3.18)         |
| <i>P</i> value (minus placebo)                             |              | 0.296                       |

<sup>a</sup>Results are presented for all patients who had observations at both the start of the DB phase and at the endpoint of the DB maintenance phase.
